# Supplementary material
Source: PubMed Central journal article supplement (PMC3835719)

# NOSH-naproxen

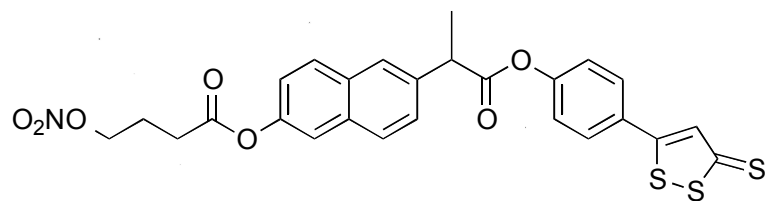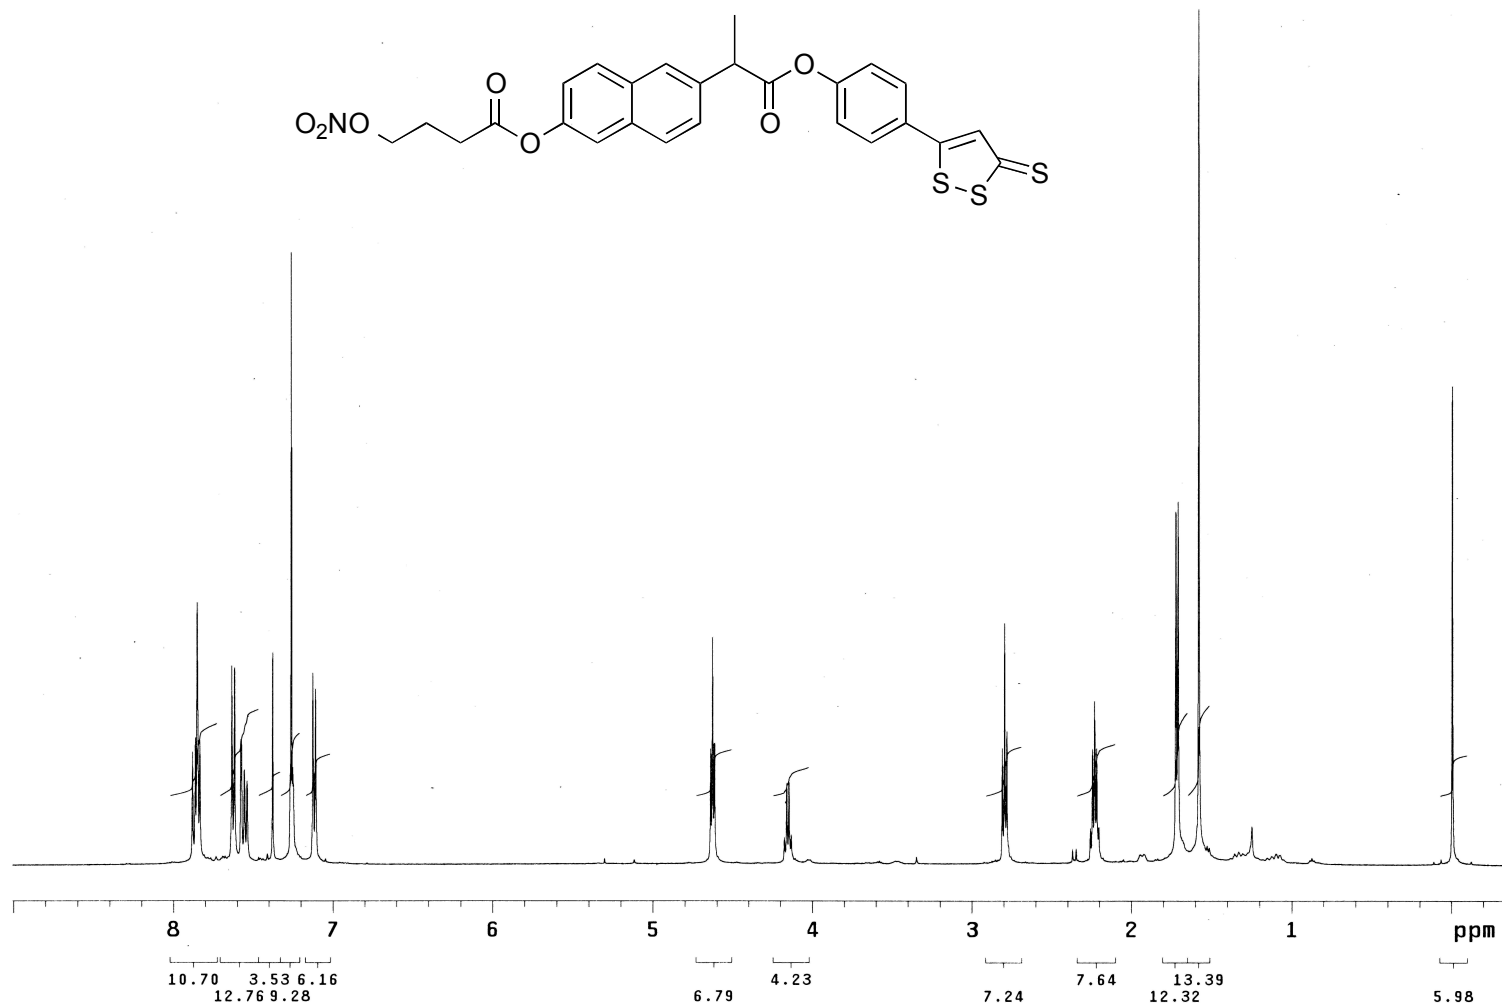

Supplement: NIHMS521244-supplement-1.pdf [file NIHMS521244-supplement-1.pdf]

# NOSH-sulindac

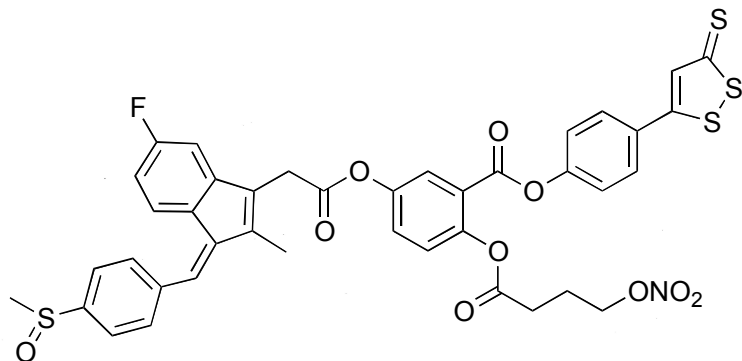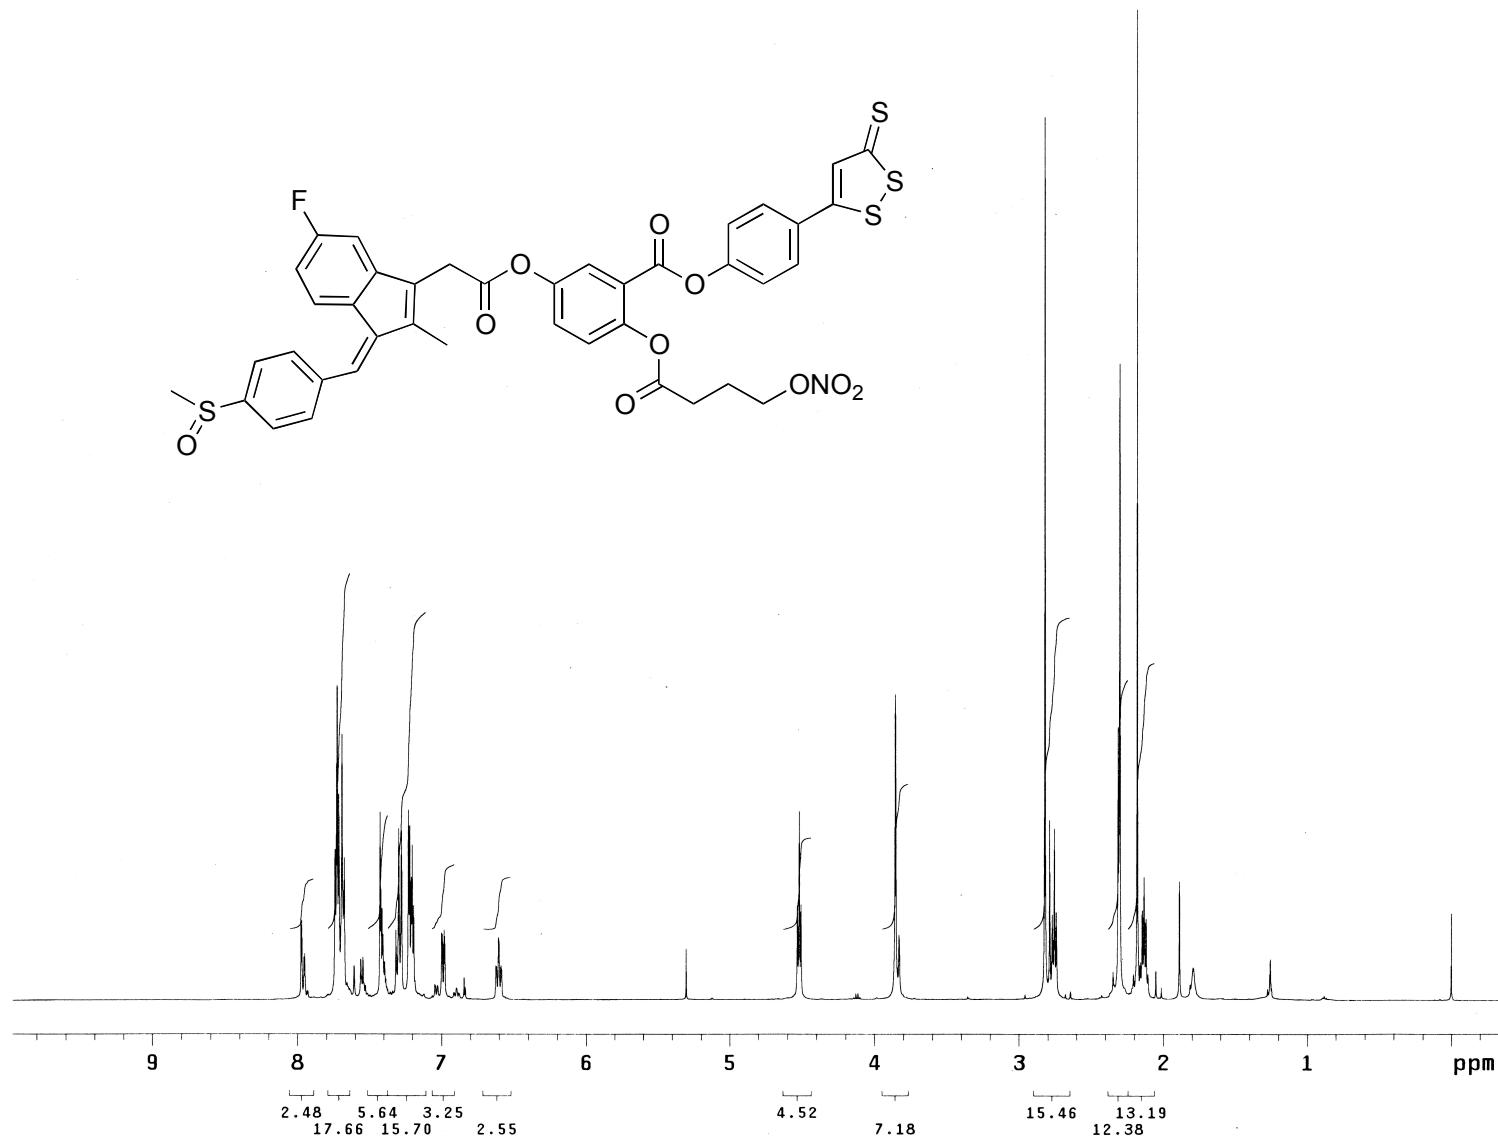

Supplement: NIHMS521244-supplement-2.pdf [file NIHMS521244-supplement-2.pdf]
